# Supplementary material for: Mesoporous Fe3O4@C submicrospheres evolved by a novel self-corrosion mechanism for high-performance lithium-ion batteries
Source: Royal Society of Chemistry journal article supplement (doi:10.1039/c4nj00090k), 2014-01-01
Supplement: c4nj00090k1.pdf [file c4nj00090k1.pdf]

## Supplementary information

### Mesoporous Fe<sub>3</sub>O<sub>4</sub>@C submicrospheres evolved from a novel self-corrosion mechanism for high-performance lithium-ion Batteries

Yongping Gan<sup>1</sup>, Huaqing Gu<sup>1</sup>, Han Xiao<sup>1</sup>, Yang Xia<sup>1</sup>, Xinyong Tao<sup>1</sup>, Hui Huang<sup>1</sup>, Jun Du<sup>1</sup>, Lusheng Xu<sup>2</sup> and Wenkui Zhang<sup>1,\*</sup>

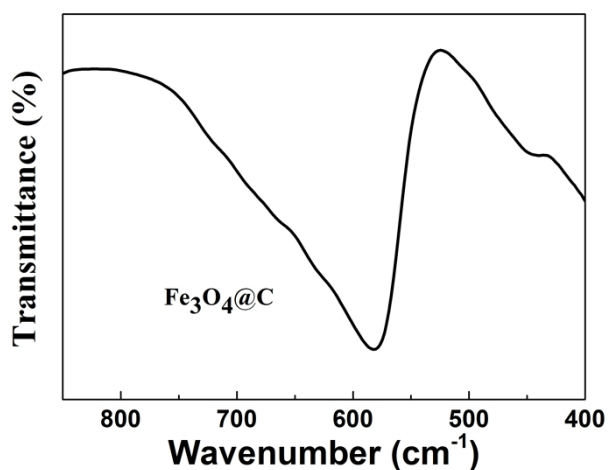

Figure S1 FT-IR spectra of Fe<sub>3</sub>O<sub>4</sub>@C submicrospheres in the 900-400 cm<sup>-1</sup> range

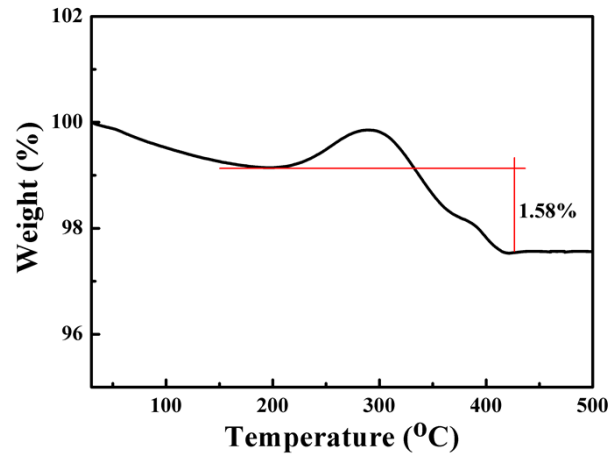

Figure S2 TGA curves of Fe<sub>3</sub>O<sub>4</sub>@C submicrospheres

Table S1 electrochemical performance comparison to previous work on Fe<sub>3</sub>O<sub>4</sub>@C anode material

| Sample                                                              | Current density<br>(mA g <sup>-1</sup> ) | Cycle<br>number | Reversible capacity<br>(mA h g <sup>-1</sup> ) | Ref.      |
|---------------------------------------------------------------------|------------------------------------------|-----------------|------------------------------------------------|-----------|
| Carbon-Encapsulated<br>Fe <sub>3</sub> O <sub>4</sub> Nanoparticles | 1000                                     | 100             | 998                                            | 1         |
| Hollow Fe <sub>3</sub> O <sub>4</sub> /C beads                      | 100                                      | 50              | 698                                            | 2         |
| Fe <sub>3</sub> O <sub>4</sub> @C nanorings                         | 200                                      | 160             | 923                                            | 3         |
| C-Fe <sub>3</sub> O <sub>4</sub> nanospheres                        | 200                                      | 60              | 712                                            | 4         |
| Porous Fe <sub>3</sub> O <sub>4</sub> /C<br>Microbelts              | 120                                      | 50              | 710                                            | 5         |
| Carbon Coated Fe <sub>3</sub> O <sub>4</sub><br>Nanospindles        | 400                                      | 80              | 530                                            | 6         |
| Mesoporous Fe <sub>3</sub> O <sub>4</sub> @C<br>submicrospheres     | 100                                      | 50              | 930                                            | This work |

#### Reference

- 1 C.N. He, S. Wu, N.Q. Zhao, C.S. Shi, E.Z. Liu, J.J. Li, *Acs Nano*, 2013, **7**, 4459-4469.
- 2 Z. Xiao, Y. Xia, Z. H. Ren, Z. Y. Liu, G. Xu, C. Y. Chao, X. Li, G. Shen and G. R. Han, *J. Mater. Chem.*, 2012, **22**, 20566-20573.
- 3 L. Wang, J. W. Liang, Y. C. Zhu, T. Mei, X. Zhang, Q. Yang and Y. T. Qian, *Nanoscale*, 2013, **5**, 3627-3631.
- 4 J. S. Chen, Y. Zhang and X. W. Lou, *ACS Appl. Mater. Inter.*, 2011, **3**, 3276-3279.
- 5 J. S. Xu and Y. J. Zhu, *Acs Appl. Mater. Inter.*, 2012, **4**, 4752-4757.
- 6 W. M. Zhang, X. L. Wu, J. S. Hu, Y. G. Guo and L. J. Wan, *Adv. Funct. Mater.*, 2008, **18**, 3941-3946.
